# Supplementary material
Source: publisher site journal article supplement (https://www.dovepress.com/article/450638)
Supplement: Supplementary file 1 [file get_supplementary_file.php]

**Supplementary Table 1. Analysis of risk factors for 1-year mortality in patients with DC and HE by Cox regression analysis.**

|  | | Univariate analysis |  |  | | Multivariate analysis |  |
| --- | --- | --- | --- | --- | --- | --- | --- |
|  | OR (95% CI) | | P value |  | OR (95% CI) | | P value |
| Age | 0.083(0.301-2.591) | | 0.82 |  |  | |  |
| ALT | 1.007(1.003-1.011) | | <0.01 |  |  | |  |
| AST | 1.004(1.002-1.007) | | <0.01 |  |  | |  |
| GGT | 1.007(1.003-1.010) | | <0.01 |  | 1.008(1.003-1.012) | | <0.01 |
| TBil | 1.017(1.004-1.029) | | <0.01 |  |  | |  |
| CRP | 1.010(0.999-1.021) | | 0.06 |  |  | |  |
| INR | 2.555(1.171-5.573) | | 0.02 |  |  | |  |
| FT3 | 0.347(0.162-0.740) | | <0.01 |  | 0.248(0.103-0.596) | | <0.01 |
| FT4 | 1.220(1.032-1.443) | | 0.02 |  |  | |  |
| Diabetes | 0.946(0.266-3.356) | | 0.93 |  |  | |  |
| UGIB | 1.415(0.186-10.769) | | 0.76 |  |  | |  |
| SBP | 0.157(0.053-0.463) | | <0.01 |  | 0.133(0.038-0.463) | | <0.01 |
| HE grades | 1.216(0.222-6.654) | | 0.82 |  |  | |  |

Abbreviations: DC, decompensated cirrhosis; HE, hepatic encephalopathy; ALT: alanine aminotransferase; AST, aspartate aminotransferase; GGT, gamma glutamyl transferase; TBil: total bilirubin; CRP, C-reactive protein; INR: international normalized ratio; WBC, white blood cell; FT3, free triiodothyronine; FT4, free tetraiodothyronine; UGIB, upper gastrointestinal bleeding; SBP: spontaneous bacterial peritonitis; OR: odds ratio; CI, confidence interval.
